# Supplementary material
Source: PubMed Central journal article supplement (PMC2939930)
Supplement: NIHMS231956-supplement-1_si_001.pdf [file NIHMS231956-supplement-1_si_001.pdf]

# **Modulating Heme Redox Potential Through Protein-Induced Porphyrin Distortion**

Charles Olea, Jr.,<sup>†</sup> John Kuriyan,<sup>†</sup> and Michael A. Marletta<sup>\*†</sup>

*Departments of Molecular and Cell Biology and Chemistry, California Institute for  
Quantitative Biosciences, Howard Hughes Medical Institute, and Division of Physical  
Biosciences, University of California, Berkeley, Berkeley, CA 94720-3220*

\*marletta@berkeley.edu

| Index                                               | Page |
|-----------------------------------------------------|------|
| Figure S1                                           | 2    |
| Figure S2                                           | 3    |
| Figure S3                                           | 4    |
| Experimental details                                | 5    |
| Structural alignment and resonance Raman discussion | 9    |
| Table S1                                            | 10   |
| Table S2                                            | 11   |
| Table S3                                            | 12   |
| References                                          | 13   |

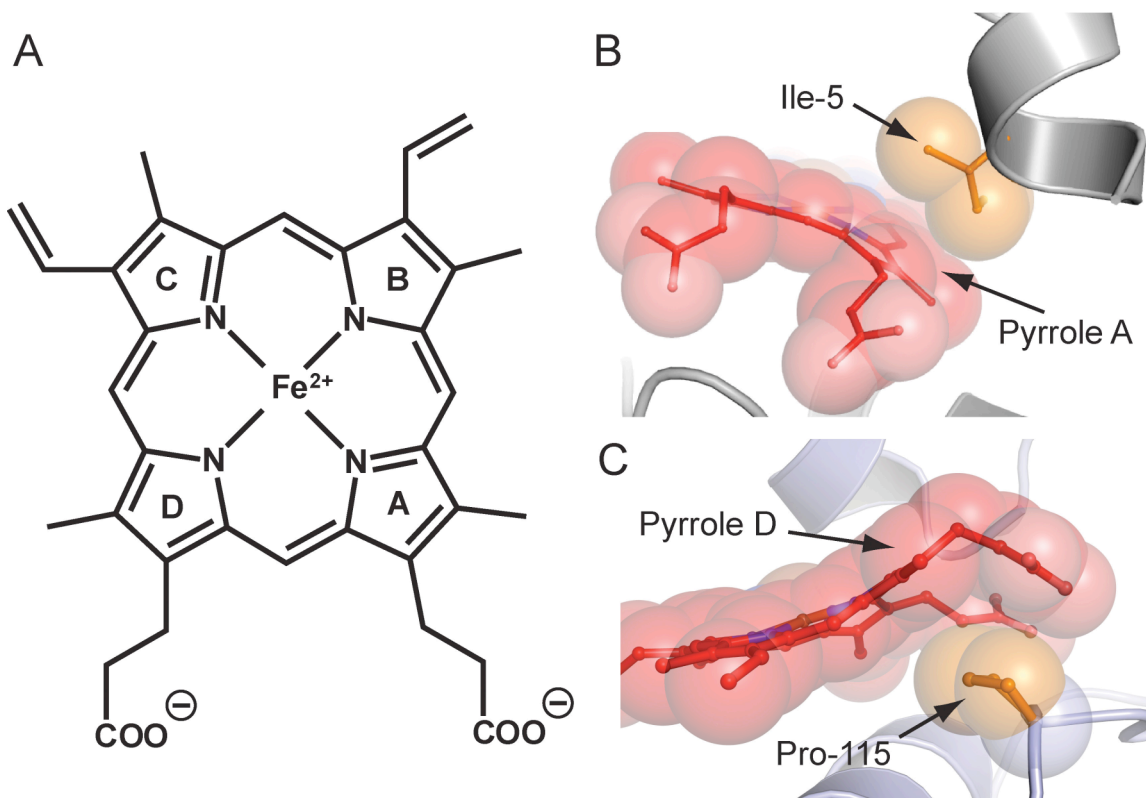

**Figure S1.** Heme Distortion in wild-type *Tt* H-NOX. A) Heme prosthetic group with pyrrole groups A-D labeled. B) Ball-and-stick and space filling model of Ile-5 and C) Pro-115 and the surrounding heme environment of wild-type *Tt* H-NOX. Ile-5 and Pro-115 push down and up against the heme, respectively, causing pronounced kinks in the heme. Out-of-plane distortions up to 2 Å are observed in the crystal structure. The I5L mutation caused a disruption of the pyrrole A and  $\gamma/\delta$  carbon interaction, which allowed the heme cofactor to relax and become planar. The P115A mutation eliminates the steric bulk at the proximal side of the heme and allows pyrrole D to move into the plane. The effect of the double mutation I5L/P115A was not additive. The two mutations appeared to counterbalance each other and the degree of heme distortion was higher than the single mutant P115A. Since, the I5L/P115A double mutant displayed a distinct degree of distortion it was included in subsequent analyses.

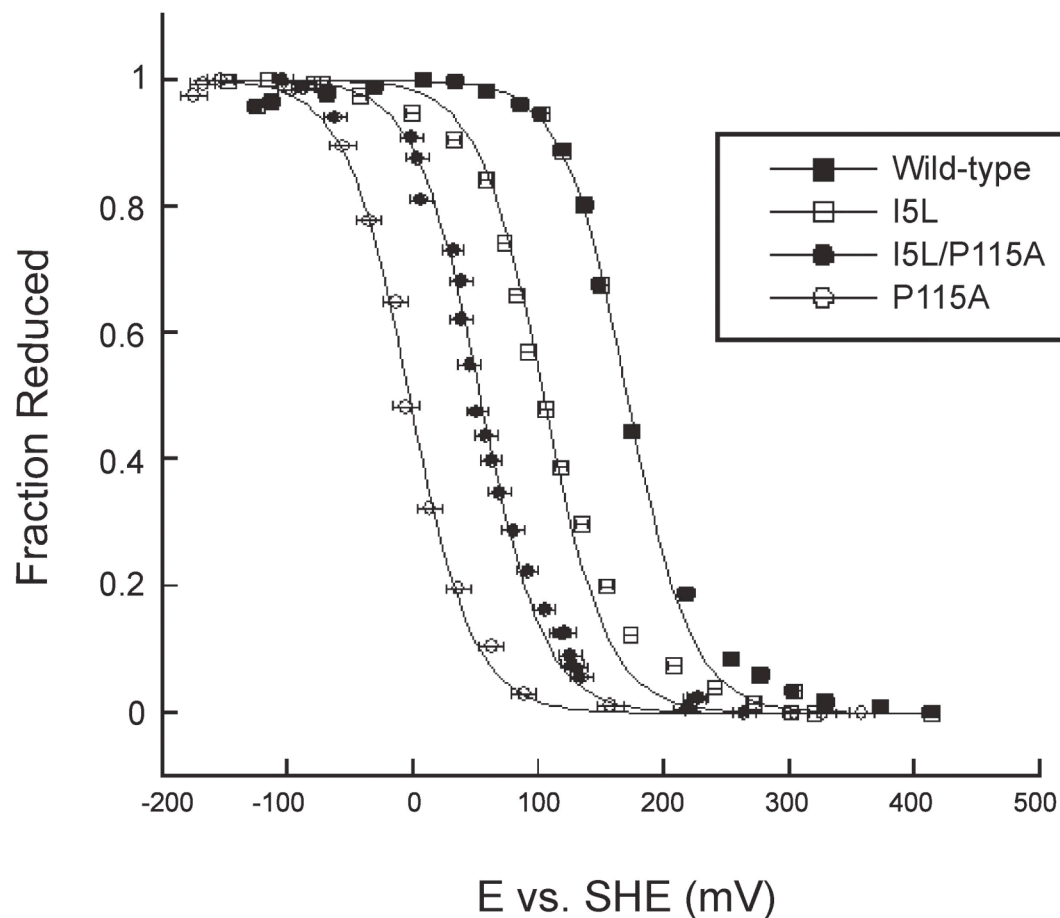

**Figure S2.** Reduction Potential of wild-type and mutants. The reduction potential was measured and calculated as described.<sup>5,8</sup> Titration curves for wild-type<sup>1</sup>, I5L, I5L/P115A, and P115A<sup>1</sup> were determined against the standard hydrogen electrode (SHE). The ratio of reduced Fe<sup>2+</sup> to oxidized Fe<sup>3+</sup> heme was measured based on their  $\alpha/\beta$  maximum at approximately 557 (reduced) nm for wild-type and I5L. The difference absorbance of the  $\alpha/\beta$  maximum for reduced and the  $\alpha/\beta$  minimum for oxidized was used to calculate the fraction reduced for I5L/P115A and P115A. The voltage against the SHE was measured for both oxidative and reductive titrations of the wild-type protein and the mutants. Error bars represent the standard error for wild-type and P115A and range and standard deviation for I5L and I5L/P115A, respectively.

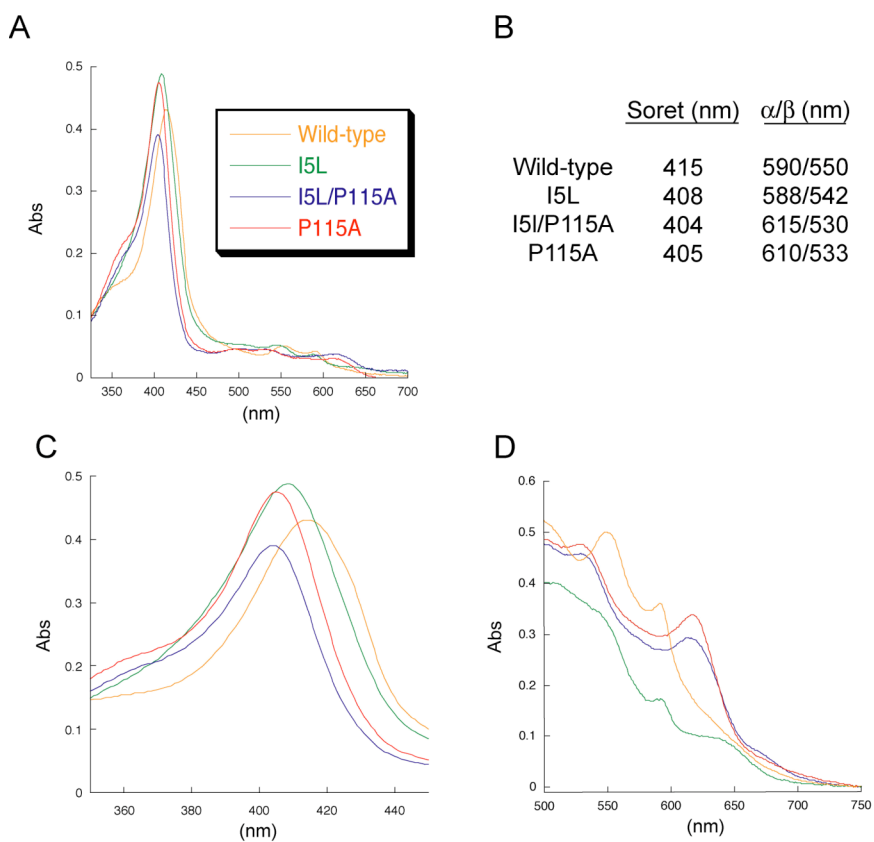

**Figure S3.** Ferric Spectra of the Tt H-NOX wild-type protein and mutants. A) Full spectra of wild-type and mutants. B) Values for  $\lambda$  max of the Soret and  $\alpha/\beta$  regions. Panel C) shows a more detailed Soret region and D)  $\alpha/\beta$  regions of wild-type protein and mutants.

## **Experimental details**

**Expression of the I5L and I5L/P115A mutants of *Tt* H-NOX in *E. coli*.** Mutagenesis, cell culture, and expression procedures were carried out as previously described.<sup>2</sup>

**Purification of the I5L and I5L/P115A mutants in *E. coli* for crystallization and potentiometry.** Cell lysis and thermal treatment were carried out as described with the exception of an ultracentrifugation step after cell lysis.<sup>2</sup> After thermal treatment the supernatant was loaded onto a Toyopearl Q 650M anion exchange column that was equilibrated buffer A (50 mM TEA, pH 7.5, and 50 mM NaCl) at a flow rate of 1.5 mL/min. The flow-through was passed down a Sephadex G-25 column equilibrated in buffer B (50 mM HEPES pH 6.25). The red-colored flow through was collected and loaded on a SP 650M cation exchange column equilibrated in buffer B at 1 mL/min. The protein was eluted off the cation exchange column with a salt gradient of 0-40% buffer C (50 mM HEPES and 500 mM NaCl pH 6.25) at 1 mL/min in 2 mL fractions were collected. Red-colored fractions were initially pooled based on Coomassie stain and for subsequent runs based on a Soret:  $A_{280}$  ratio above 1.6. Both I5L and I5L/P115A were isolated as the Fe(II)-O<sub>2</sub> complex<sup>2</sup>, and stored at -80 °C in a final buffer of 50 mM HEPES, 200 mM NaCl, and 5% glycerol at pH 6.25.

**Crystallization of the I5L mutant.** Samples of I5L were equilibrated with 20 mM TEA pH 7.5 and concentrated to 25 mg/mL. Orthorhombic crystals were grown by sitting drop vapor diffusion by mixing 1  $\mu$ L of protein solution with 4  $\mu$ L of the reservoir solution and equilibrating against 700  $\mu$ L of 0.1 M MES pH 6, 0.1 M LiCl, and 26%

polyethylene glycol 4000 for two days at 16 °C. Cryoprotection was achieved by addition of mother liquor substituted with 30% glycerol in increasing glycerol amounts of 5% to a final concentration of 15% glycerol, flash frozen, and stored in liquid nitrogen.

**Crystallization of the I5L/P115A mutant.** Samples of I5L/P115A were equilibrated with 20 mM TEA pH 7.5 and concentrated to 30 mg/mL. Monoclinic crystals were grown by sitting drop vapor diffusion by mixing 1  $\mu$ L of protein solution with 3  $\mu$ L of the reservoir solution and equilibrating against 700  $\mu$ L of 0.05 M MES pH 6, 0.1 M LiCl, and 22% polyethylene glycol 4000 for two days at 16 °C. Cryoprotection was achieved by addition of mother liquor substituted with 40% glycerol in increasing amounts of 5% glycerol to a final concentration of 25% glycerol, flash frozen, and stored in liquid nitrogen.

**X-ray data collection, phasing, and refinement of the I5L mutant.** X-ray data were collected by using synchrotron radiation at beamline 8.2.1 at the Advanced Light Source, Lawrence Berkeley National Laboratory. Diffraction images were collected at 100 K with 7 s exposure time and 1° oscillations per frame. Data were processed with the HKL2000 suite.<sup>3</sup> Molecular replacement was carried out with the CCP4 program Phaser<sup>4</sup> using P115A H-NOX (PDB ID: 3EEE) as the search model. Model building was carried out by using the program Coot<sup>5</sup> and refinement was carried out using CNS and Phenix with TLS refinement parameters incorporated. The final model includes 2 I5L molecules in the asymmetric unit. The structure of I5L was refined to a final overall  $R_{\text{work}}$  and  $R_{\text{free}}$  of 21.7% and 26.0% at 2.15 Å resolution, respectively.

**X-ray data collection, phasing, and refinement the I5L/P115A mutant.** X-ray data were collected by using synchrotron radiation at beamline 8.2.1 at the Advanced Light Source, Lawrence Berkeley National Laboratory. Diffraction images were collected at 100 K with 5 s exposure time and 1° oscillations per frame. Data processing, phasing, model building and refinement were carried out as described above. The final model includes 2 I5L/P115A molecules in the asymmetric unit. The structure of I5L/P115A was refined to a final overall  $R_{\text{work}}$  and  $R_{\text{free}}$  of 18.9% and 23.5% at 2.04 Å resolution, respectively.

#### **Spectrophotometric Redox Titrations of the I5L and I5L/P115A mutants.**

Potentiometric titrations of I5L and I5L/P115A were performed as described previously.<sup>1,6</sup> Plotted is the mean rms deviation from planarity of wild-type and mutants versus the mean reduction potential against SHE. The error bars for the potential represent the standard error for wild-type and P115A and the range and standard deviation for I5L and I5L/P115A. The vertical bars for the rmsd from planarity represent the range of values for all molecules in the AU for each protein.

**pH titration of wild-type and mutants.** Protein (5.6 μM) was equilibrated in 50 mM titrant buffer and 50 mM NaCl at 25 °C. The protein sample was titrated with 50 mM buffer from pH 5.00-9.61 (acetate pH 5.00; MES pH 5.43, 6.03, and 6.50; HEPES pH 7.07, 7.52, and 7.96; and Bis-TRIS propane 8.53, 9.03 and 9.61). The protonation state of the distal water was measured by the difference of absorbance at the Soret maximum.

Titration curves for wild-type and I5L were fit to the Henderson-Hasselbalch equation. Error bars for wild-type and I5L represent the standard deviation. The  $pK_a$  values for I5L/P115A and P115A could not be determined within the range of the experiment due to protein instability.



All structures were overlaid and compared with monoclinic wild-type molecule A since it has the highest degree of heme distortion. It is important to note that the crystallographic data are in agreement with solution resonance Raman data.<sup>8</sup> All analyses probing the chemical properties were carried out in solution; therefore it is important that solution experiments are congruent with the crystallographic data.

| <b>Table S1. Statistics of crystallographic data collection and refinement statistics</b> |                                          |                         |
|-------------------------------------------------------------------------------------------|------------------------------------------|-------------------------|
|                                                                                           | I5L                                      | I5L/P115A               |
| <b><i>Data Collection</i></b>                                                             |                                          |                         |
| Space group                                                                               | <i>P</i> 2 <sub>1</sub> 2 <sub>1</sub> 2 | <i>C</i> 2              |
| Cell dimensions                                                                           |                                          |                         |
| <i>a</i> , <i>b</i> , <i>c</i> (Å)                                                        | 79.825, 126.095, 42.742                  | 127.158, 79.828, 43.322 |
| $\alpha$ , $\beta$ , $\gamma$ (°)                                                         | 90                                       | $\beta = 102.25$        |
| Resolution (Å)                                                                            | 2.15                                     | 2.04                    |
| $R_{\text{merge}}$ (%)                                                                    | 6 (42)                                   | 5 (14)                  |
| $I / \sigma^a$                                                                            | 24.7 (4.8)                               | 22.7 (8.3)              |
| Completeness <sup>a</sup> (%)                                                             | 99.5 (99.8)                              | 99.4 (95.0)             |
| Redundancy                                                                                | 6.7                                      | 3.7                     |
| <b><i>Refinement</i></b>                                                                  |                                          |                         |
| No. of reflections                                                                        | 23163                                    | 25754                   |
| $R_{\text{work}} / R_{\text{free}}^b$ (%)                                                 | 21.7/26.0                                | 18.9/23.4               |
| No. atoms                                                                                 |                                          |                         |
| Protein                                                                                   | 2935                                     | 3098                    |
| Heme                                                                                      | 86                                       | 86                      |
| O <sub>2</sub> Molecules                                                                  | 2                                        | 2                       |
| Solvent molecules                                                                         | 55                                       | 145                     |
| Overall <i>B</i> -factors                                                                 | 43.8                                     | 26.0                    |
| Rmsd Bond lengths (Å)                                                                     | 0.010                                    | 0.009                   |
| Rmsd Bond angles (°)                                                                      | 1.035                                    | 1.060                   |
| <sup>a</sup> The values in parentheses relate to highest-resolution shells.               |                                          |                         |
| <sup>b</sup> $R_{\text{free}}$ is calculated for a randomly chosen 5% of reflections.     |                                          |                         |

**Table S2.** Heme deviations from planarity of mutants of and wild-type *Tt* H-NOX<sup>a</sup>

|                                        | rms<br>deviation <sup>b</sup> | Saddling <sup>c</sup> | Ruffling <sup>c</sup> | Tilt <sup>f</sup><br>(degrees) |
|----------------------------------------|-------------------------------|-----------------------|-----------------------|--------------------------------|
| I5L                                    |                               |                       |                       |                                |
| Heme A                                 | 0.34                          | -0.832                | -0.634                | 81                             |
| Heme B                                 | 0.34                          | -0.816                | -0.758                | 79                             |
| I5L/P115A                              |                               |                       |                       |                                |
| Heme A                                 | 0.20                          | -0.448                | -0.216                | 88                             |
| Heme B                                 | 0.16                          | -0.415                | -0.261                | 86                             |
| P115A <sup>d</sup>                     |                               |                       |                       |                                |
| Heme A                                 | 0.22                          | -0.499                | -0.612                | 80                             |
| Heme B                                 | 0.22                          | -0.395                | -0.766                | 84                             |
| Heme C                                 | 0.12                          | -0.043                | -0.488                | 88                             |
| Heme D                                 | 0.15                          | 0.066                 | -0.517                | 87                             |
| Wild-type<br>monoclinic <sup>e</sup>   |                               |                       |                       |                                |
| Heme A                                 | 0.46                          | -1.069                | -1.105                | 78                             |
| Heme B                                 | 0.33                          | -0.634                | -0.814                | 86                             |
| Wild-type<br>orthorhombic <sup>e</sup> |                               |                       |                       |                                |
| Heme A                                 | 0.45                          | -1.092                | -1.094                | 80                             |
| Heme B                                 | 0.44                          | -0.994                | -1.210                | 81                             |

<sup>a</sup>Fe(II)-O<sub>2</sub> complexes.

<sup>b</sup>rms deviation from planarity in angstroms.

<sup>c</sup>Heme conformations calculated using normal-coordinate analysis<sup>9,10</sup>. The numerical value shown is the displacement along the normal mode in Angstroms.

<sup>d</sup>1

<sup>e</sup>10

<sup>f</sup>Calculated using the least squares plane of the 4 pyrrole nitrogens in the heme (other atoms were excluded due to the high degree of distortion) and the five imidazole ring atoms of H102 in MOLEMAN2<sup>7</sup>. The acute angle is shown.

**Table S3.** Heme deviations from planarity in the crystal structure of P115A

| Angles between pyrrole groups in P115A and wild-type H-NOX <sup>a</sup> |            |            |            |            |            |            |
|-------------------------------------------------------------------------|------------|------------|------------|------------|------------|------------|
|                                                                         | $\Phi$ A-B | $\Phi$ B-C | $\Phi$ C-D | $\Phi$ D-A | $\Phi$ A-C | $\Phi$ B-D |
| I5L                                                                     |            |            |            |            |            |            |
| Heme A                                                                  | 10.58      | 6.97       | 26.14      | 21.01      | 17.08      | 24.69      |
| Heme B                                                                  | 11.02      | 12.42      | 23.84      | 19.18      | 21.05      | 23.90      |
| I5L/P115A                                                               |            |            |            |            |            |            |
| Heme A                                                                  | 2.21       | 6.46       | 18.13      | 14.72      | 8.10       | 13.92      |
| Heme B                                                                  | 1.29       | 8.19       | 13.74      | 9.53       | 8.20       | 10.81      |
| P115A <sup>b</sup>                                                      |            |            |            |            |            |            |
| Heme A                                                                  | 8.86       | 12.04      | 14.26      | 10.25      | 15.22      | 16.35      |
| Heme B                                                                  | 8.65       | 12.71      | 17.05      | 11.15      | 16.55      | 17.43      |
| Heme C                                                                  | 1.16       | 10.43      | 8.79       | 8.35       | 9.71       | 9.51       |
| Heme D                                                                  | 10.31      | 15.20      | 9.88       | 0.28       | 9.69       | 10.07      |
| Wild-type orthorhombic <sup>c</sup>                                     |            |            |            |            |            |            |
| heme A                                                                  | 15.30      | 20.00      | 29.30      | 23.00      | 32.10      | 28.00      |
| heme B                                                                  | 21.80      | 15.20      | 28.00      | 23.90      | 30.90      | 31.80      |
| Wild-type monoclinic <sup>c</sup>                                       |            |            |            |            |            |            |
| heme A                                                                  | 17.30      | 18.20      | 24.10      | 27.30      | 32.60      | 27.40      |
| heme B                                                                  | 15.90      | 9.80       | 26.90      | 11.50      | 16.50      | 27.40      |

<sup>a</sup> $\Phi$ A-B,  $\Phi$ B-C, etc. refer to the angles in degrees between the planes formed by pyrrole groups A and B, and B and C, respectively.

<sup>b</sup> 1

<sup>c</sup> 10

## References

- (1) Olea, C., Jr.; Boon, E. M.; Pellicena, P.; Kuriyan, J.; Marletta, M. A. *ACS Chem. Biol.* **2008**, *3*, 703-710.
- (2) Karow, D. S.; Pan, D.; Tran, R.; Pellicena, P.; Presley, A.; Mathies, R. A.; Marletta, M. A. *Biochemistry* **2004**, *43*, 10203-10211.
- (3) Otwinowski, Z.; Minor, W. *Macromol. Cryst., Part A* **1997**, *276*, 307-326.
- (4) McCoy, A. J.; Grosse-Kunstleve, R. W.; Storoni, L. C.; Read, R. J. *Acta Crystallogr., Sect. D* **2005**, *61*, 458-464.
- (5) Emsley, P.; Cowtan, K. *Acta Crystallogr., Sect. D* **2004**, *60*, 2126-2132.
- (6) Dutton, P. L. *Methods Enzymol.* **1978**, *54*, 411-435.
- (7) Kleywegt, G. J.; Jones, T. A. *Acta Crystallogr., Sect. D* **1999**, *55*, 941-944.
- (8) Tran, R.; Boon, E. M.; Marletta, M. A.; Mathies, R. A. *Biochemistry* **2009**, *48*, 8568-8577.
- (9) Jentzen, W.; Ma, J. G.; Shelnuitt, J. A. *Biophys. J.* **1998**, *74*, 753-763.
- (10) Pellicena, P.; Karow, D. S.; Boon, E. M.; Marletta, M. A.; Kuriyan, J. *Proc. Natl. Acad. Sci. U.S.A.* **2004**, *101*, 12854-12859.
